# Supplementary material for: Efficacy of a Web-Based Safety Decision Aid for Women Experiencing Intimate Partner Violence: Randomized Controlled Trial
Source: PubMed Central journal article supplement (PMC6858022; doi:10.2196/jmir.8617), 2018-01-10
Supplement: jmir_v19i12e426_app1.pdf [file jmir_v19i12e426_app1.pdf]

Supplementary Table: Outcome assessment schedule for the isafe trial

| Outcome                                                       | Higher/lower<br>scores beneficial? | Time point |     |     |     |
|---------------------------------------------------------------|------------------------------------|------------|-----|-----|-----|
|                                                               |                                    | BL         | 3m  | 6m  | 12m |
| <i>Exposure to violence domain</i>                            |                                    |            |     |     |     |
| Severity of Violence Against Women Scale (SVAWS)              | Lower                              | X          | X   | X   | X*  |
| SVAWS Threats of violence subscore                            | Lower                              | X          | X   | X   | X   |
| SVAWS Acts of violence subscore                               | Lower                              | X          | X   | X   | X   |
| SVAWS Sexual violence subscore                                | Lower                              | X          | X   | X   | X   |
| Women's Experience with Battering (WEB)                       | Lower                              | X          |     | X   | X   |
| <i>Mental health domain</i>                                   |                                    |            |     |     |     |
| Center for Epidemiologic Studies Depression scale, Revised    | Lower                              | X          | X   | X   | X*  |
| Post-Traumatic Stress Disorder Checklist, Civilian Version    | Lower                              | X**        | X** | X** | X   |
| Alcohol Use Disorder Identification Test (AUDIT) dichotomised | Lower                              | X          |     | X   | X   |
| Drug Abuse Screening Tool (DAST-10)                           | Lower                              | X          |     | X   | X   |
| <i>Decisional process domain</i>                              |                                    |            |     |     |     |
| Decisional Conflict Scale (DCS)                               | Lower                              | X          | X   | X   | X   |
| <i>Safety-seeking behaviour domain</i>                        |                                    |            |     |     |     |
| Safety Checklist                                              | Higher                             | X          | X   | X   | X   |
| Safety Checklist Helpfulness                                  | Higher                             | X          | X   | X   | X   |

Notes: BL: Baseline; \*: Primary endpoint; \*\*: One item missing in a majority of cases
