# Supplementary material for: Efficacy of a Web-Based Safety Decision Aid for Women Experiencing Intimate Partner Violence: Randomized Controlled Trial
Source: PubMed Central journal article supplement (PMC6858022; doi:10.2196/jmir.8617), 2018-01-10
Supplement: jmir_v19i12e426_app2.pdf [file jmir_v19i12e426_app2.pdf]

| Supplementary Table:<br>Secondary outcomes                                 | Study Group  |           |        |         |           |        | Unadjusted                             |              |         | Adjusted*                              |              |         |
|----------------------------------------------------------------------------|--------------|-----------|--------|---------|-----------|--------|----------------------------------------|--------------|---------|----------------------------------------|--------------|---------|
|                                                                            | Intervention |           |        | Control |           |        | Estimated intervention effect (95% CI) |              | P value | Estimated intervention effect (95% CI) |              | P value |
|                                                                            | N            | Mean (SE) |        | N       | Mean (SE) |        |                                        |              |         |                                        |              |         |
| Womens' Experience with Battering (WEB)                                    |              |           |        |         |           |        |                                        |              |         |                                        |              |         |
| 6 Months                                                                   | 162          | 36.88     | (1.28) | 181     | 38.13     | (1.15) | -1.24                                  | (-4.62,2.14) | 0.51    | 0.45                                   | (0.1,1.84)   | 0.24    |
| 12 Months                                                                  | 173          | 36.04     | (1.29) | 184     | 36.64     | (1.21) | -0.60                                  | (-4.09,2.89) | 0.77    | 0.63                                   | (0.19,2.19)  | 0.43    |
| Post-Traumatic Stress Disorder Checklist, Civilian Version (PCL-C)         |              |           |        |         |           |        |                                        |              |         |                                        |              |         |
| 6 Months                                                                   | 108          | 38.83     | (1.61) | 123     | 40.86     | (1.58) | -2.03                                  | (-6.48,2.42) | 0.40    | -1.61                                  | (-5.29,2.07) | 0.39    |
| 12 Months                                                                  | 167          | 38.35     | (1.26) | 175     | 39.48     | (1.29) | -1.13                                  | (-4.68,2.43) | 0.62    | -1.72                                  | (-4.71,1.26) | 0.26    |
| Alcohol Use Disorder Identification Test (AUDIT) dichotomized <sup>a</sup> |              |           |        |         |           |        |                                        |              |         |                                        |              |         |
| 6 Months                                                                   | 135          | 7.23      | (0.68) | 149     | 7.31      | (0.59) | -0.08                                  | (-1.86,1.7)  | 0.59    | 0.39                                   | (0.12,1.09)  | 0.08    |
| 12 Months                                                                  | 148          | 6.70      | (0.56) | 163     | 6.85      | (0.59) | -0.14                                  | (-1.75,1.46) | 0.74    | 1.25                                   | (0.44,3.52)  | 0.66    |
| Drug Abuse Screening Tool (DAST-10) <sup>b</sup>                           |              |           |        |         |           |        |                                        |              |         |                                        |              |         |
| 6 Months                                                                   | 63           | 3.87      | (0.28) | 76      | 3.82      | (0.26) | 0.06                                   | (-0.7,0.81)  | 0.72    | 0.81                                   | (0.2,3.25)   | 0.75    |
| 12 Months                                                                  | 70           | 3.34      | (0.26) | 78      | 3.27      | (0.26) | 0.07                                   | (-0.65,0.8)  | 0.54    | 3.66                                   | (0.85,20.86) | 0.1     |
| Decisional Conflict Scale (DCS)                                            |              |           |        |         |           |        |                                        |              |         |                                        |              |         |
| Post-Baseline                                                              | 196          | 47.18     | (1.08) | 203     | 45.40     | (1.03) | 1.77                                   | (-1.17,4.72) | 0.16    | 0.05                                   | (-2.73,2.83) | 0.97    |
| 3 Months                                                                   | 164          | 14.23     | (1.34) | 169     | 14.98     | (1.32) | -0.75                                  | (-4.44,2.94) | 0.71    | -1.09                                  | (-3.96,1.77) | 0.46    |
| 6 Months                                                                   | 161          | 12.22     | (1.26) | 181     | 12.14     | (1.27) | 0.07                                   | (-3.44,3.58) | 0.61    | -0.76                                  | (-3.61,2.09) | 0.6     |
| 12 Months                                                                  | 172          | 9.56      | (1.07) | 183     | 9.30      | (1.04) | 0.26                                   | (-2.69,3.2)  | 0.98    | -0.43                                  | (-3.23,2.37) | 0.76    |
| Safety Checklist                                                           |              |           |        |         |           |        |                                        |              |         |                                        |              |         |
| 3 Months                                                                   | 165          | 7.64      | (0.34) | 169     | 7.60      | (0.34) | 0.03                                   | (-0.91,0.98) | 0.89    | -0.24                                  | (-1.05,0.57) | 0.56    |
| 6 Months                                                                   | 162          | 7.73      | (0.36) | 181     | 7.46      | (0.34) | 0.27                                   | (-0.7,1.24)  | 0.53    | 0.09                                   | (-0.77,0.96) | 0.83    |
| 12 Months                                                                  | 165          | 7.64      | (0.34) | 169     | 7.60      | (0.34) | 0.03                                   | (-0.91,0.98) | 0.89    | 0.30                                   | (-0.58,1.18) | 0.5     |
| Safety Checklist Helpfulness                                               |              |           |        |         |           |        |                                        |              |         |                                        |              |         |
| 3 Months                                                                   | 161          | 13.91     | (2.02) | 165     | 13.64     | (1.88) | -0.27                                  | (-5.16,5.71) | 0.97    | 0.91                                   | (0.45,1.82)  | 0.78    |
| 6 Months                                                                   | 159          | 13.25     | (1.89) | 177     | 13.01     | (1.74) | -0.24                                  | (-4.83,5.3)  | 0.77    | 1.15                                   | (0.58,2.3)   | 0.69    |
| 12 Months                                                                  | 169          | 14.81     | (2.06) | 178     | 13.61     | (1.8)  | -1.20                                  | (-4.18,6.57) | 0.94    | 0.87                                   | (0.44,1.71)  | 0.69    |
